# Supplementary material
Source: PubMed Central journal article supplement (PMC4308471)
Supplement: NIHMS647515-supplement-2.pdf [file NIHMS647515-supplement-2.pdf]

## **Supplemental Inventory**

Figure S1

Figure S2

Figure S3

Figure S4

Figure S5

Figure S6

Table S1

Table S2

Supplemental Experimental Procedures

References

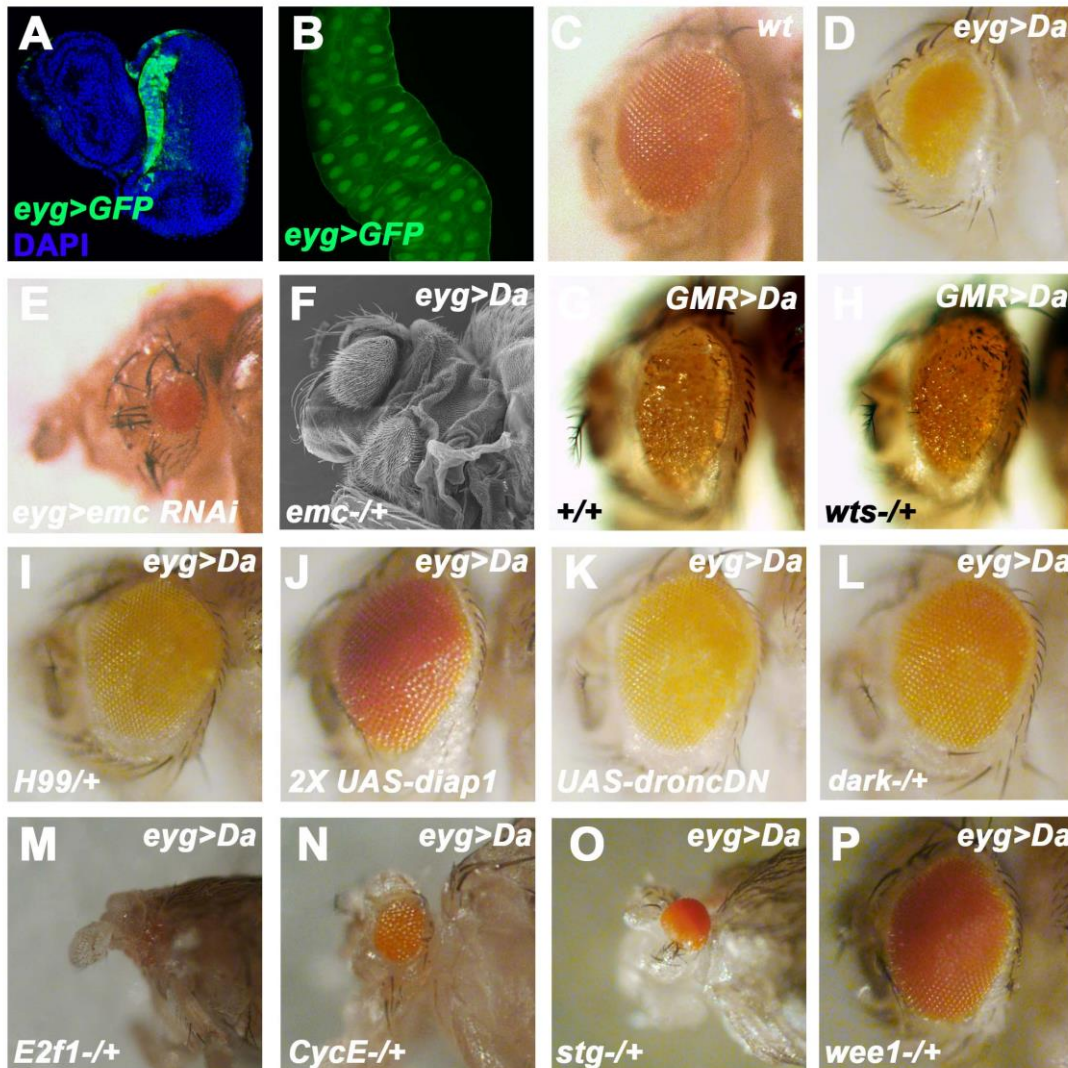

**Figure S1. Related to Figure 1**

(A-B) UAS-GFP expressed under the control of *eyg*-GAL4 in third instar eye imaginal discs (A) and salivary glands (B). (C) An adult eye of wild-type. (D) An adult eye of *eyg>Da* flies. Note the reduced size. (E) An adult eye of *eyg>emc dsRNA* flies. Note the reduction of eye size and ectopic bristles. The phenotype is more variable than for *eyg>da*. (F) *eyg<sup>CD</sup>>Da*, heterozygous for *emc<sup>AP6</sup>*. The small eye is further reduced and sometimes absent. (G) Adult eye of *GMR>Da* (H) Adult eye of *GMR>Da*, *wts<sup>X1</sup>/+*. (I) *eyg<sup>CD</sup>>Da*, heterozygous for *H99* deficiency. (J) Overexpression of *diap1* in *eyg<sup>CD</sup>>Da*. (K) Overexpression of dominant negative *dronc* in *eyg<sup>CD</sup>>Da*. (L) *eyg<sup>CD</sup>>Da*, heterozygous for *dark<sup>K11502</sup> dark<sup>82</sup>*. (M) *eyg<sup>CD</sup>>Da*, heterozygous for *E2f1<sup>07172</sup>*. This 'headless' phenotype is the most extreme observed. (N) *eyg<sup>CD</sup>>Da*, heterozygous for *CycE<sup>AR95</sup>*. (O) *eyg<sup>CD</sup>>Da*, heterozygous for *stg<sup>4</sup>*. (P) *eyg<sup>CD</sup>>Da*, heterozygous for *wee1<sup>ES1</sup>*.

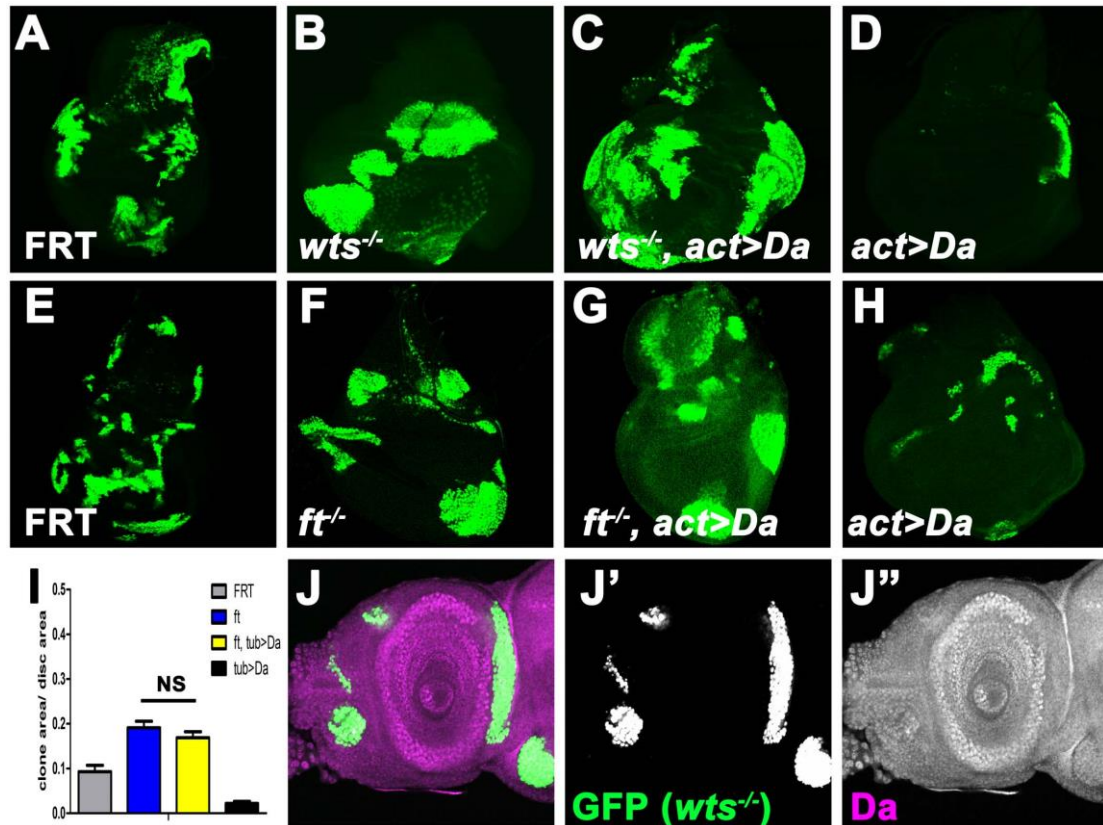

**Figure S2. Related to Figure 2**

(A-H) Third instar wing imaginal discs with GFP-expressing MARCM clones. (A) control (B) *wts<sup>X1</sup>* homozygous (C) *wts<sup>X1</sup>* homozygous, *act>Da* (D) *act>Da*. Clones of *wts<sup>X1</sup>* or *wts<sup>X1</sup>, act>Da* grow well, whereas *act>Da* clones were rarely recovered. (E) control (F), *ft<sup>NY1</sup>* homozygous (G), *ft<sup>NY1</sup>* homozygous, *tub>Da* (H) *tub>Da*. Clones of *ft<sup>NY1</sup>* or *ft<sup>NY1</sup>, tub>Da* grew well throughout the discs, whereas *tub>Da* clones were rarely recovered. (I) Quantification of results. 10 discs of each genotype were analyzed. Area of clones was normalized to the total wing disc area. Data are represented as mean±SEM. NS, not significant. (J) Eye disc with *wts* homozygous clones stained for GFP (green) and Da (magenta). (J', J'') separate GFP and Da channels.

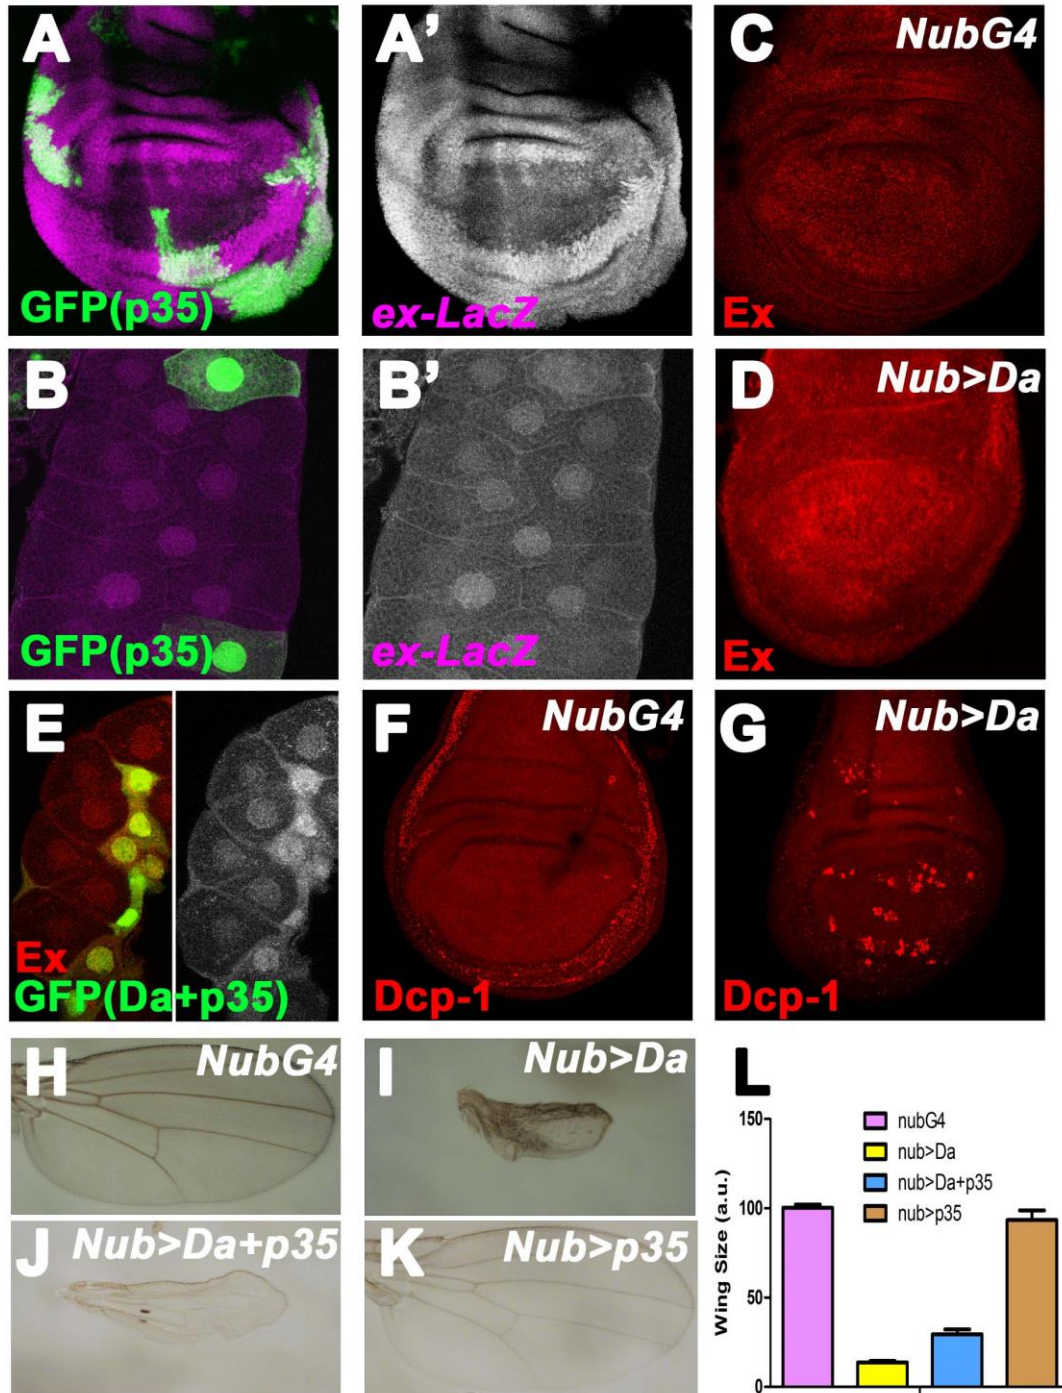

**Figure S3. Related to Figure 3**

(A-B) Wing imaginal discs (A) or salivary glands (B) containing control clones (*ActGal4>GFP+P35*, GFP positive, green) and stained for *ex-LacZ* reporter expression (magenta). Unlike *Da*-overexpressing clones (Figure 3), no elevation is observed in *ActGal4>GFP+P35* clones. (C-D) Wing imaginal discs of *NubGAL4* (C) and *Nub>Da* (D), staining for Ex antibody (red). (E) Salivary glands containing *Da*-overexpressing clones staining for Ex antibody (same specimen as Figure 3D). Note the elevation of Ex protein levels in *Da*-

overexpressing cells (D and E). (F-G) Wing imaginal discs of *NubGAL4* (F) and *Nub>Da* (G), staining for Dcp-1 antibody to identify dying cells (red). (H-K) Adult wing size after Da and p35 over-expression. (H) Control *NubGAL4* wing. (I) *Nub>Da* reduces wing size. (J) Expression of p35 partially restores *Nub>Da* wing size. (K) *Nub>p35* wing. (L) Quantification of the wing size after Da and p35 over-expression.

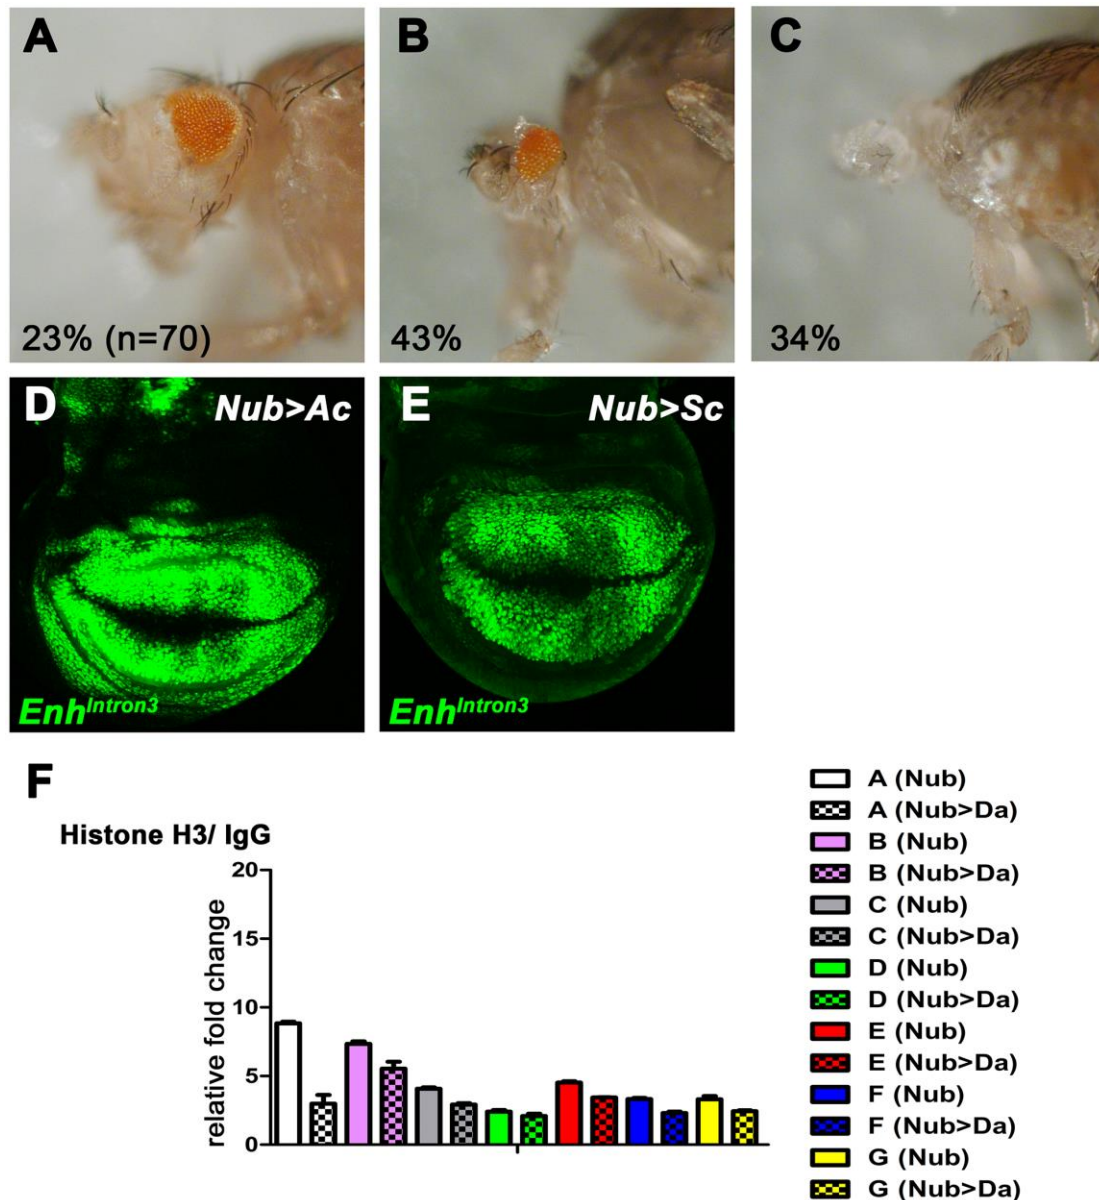

**Figure S4. Related to Figure 4**

(A-C) Adult eyes of *eyg>Da-Da* flies. The size reduction is greater than for Da and can be extreme (B) or remove the head (C). (D-E) Wing discs of *Nub>Ac* (D) and *Nub>Sc* (E), staining for *Enh<sup>intron3</sup>*-GFP reporter expression. *Enh<sup>intron3</sup>*-GFP is upregulated. (F) ChIP analysis of the *Enh<sup>intron3</sup>* enhancer. Anti-

histone H3 (HA IP) or IgG antibodies were used to precipitate chromatin from wing discs of *NubGAL4* and *Nub>UAS-HA-Da*. Quantitative PCR was done on regions A-G (see panel 4A). Graph shows the relative fold changes of anti-histone H3 compared to IgG. Results represent mean $\pm$ SEM (n=3).

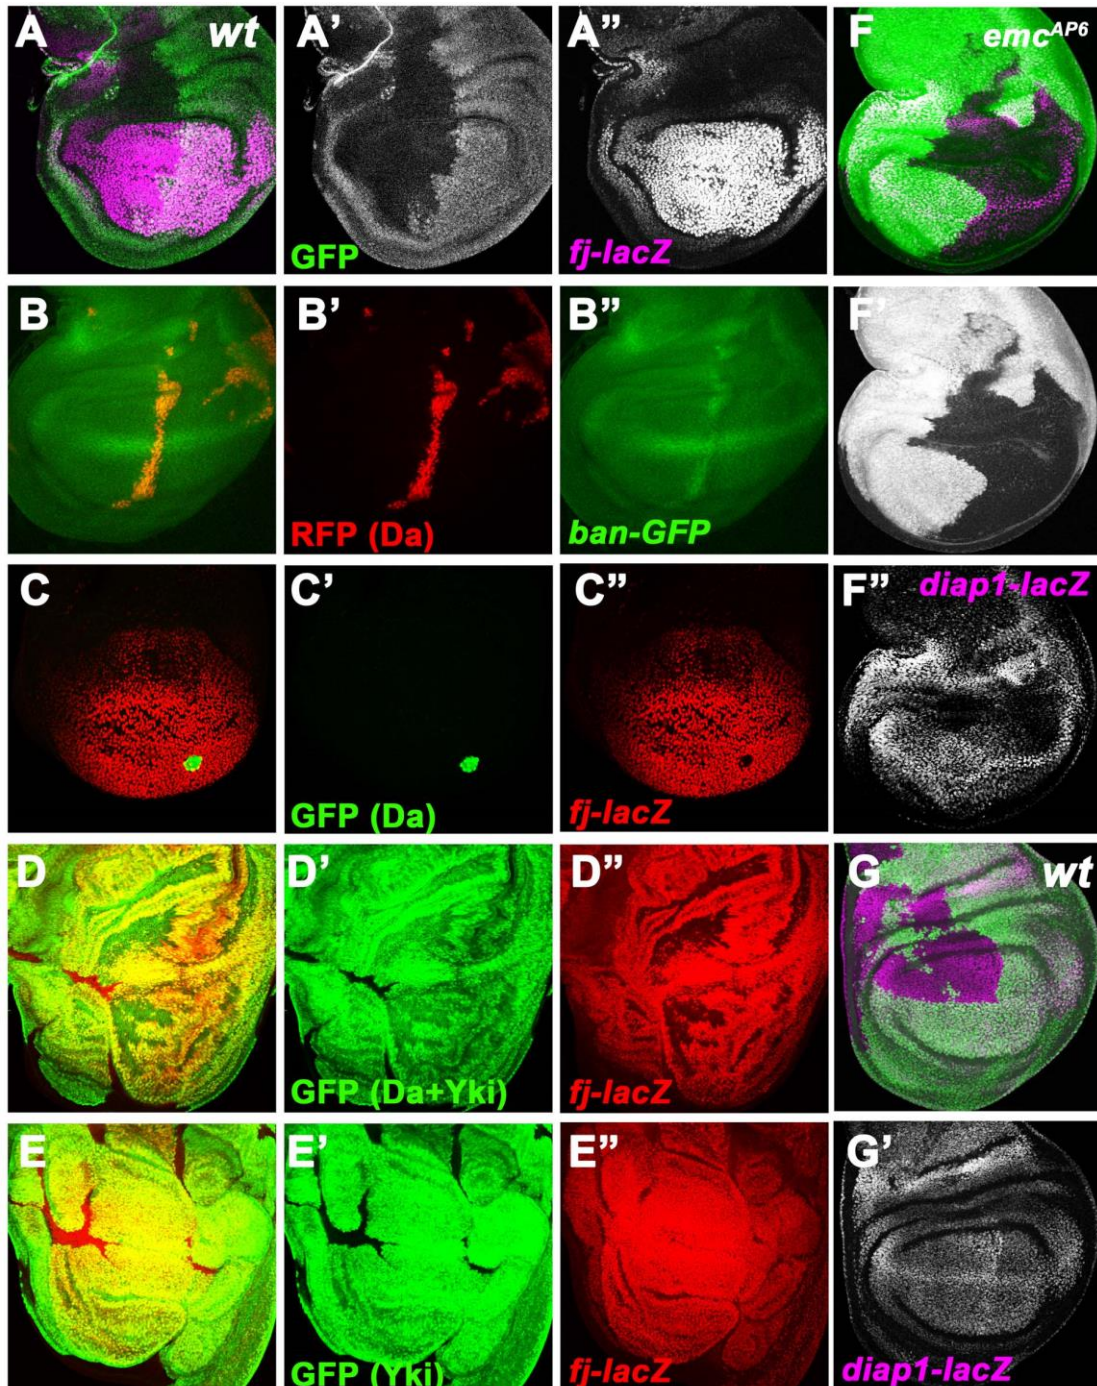

**Figure S5. Related to Figure 5**

(A) Third instar wing disc containing wild-type clones in a Minute background (GFP negative, A'). Note similar *fj-lacZ* expression levels between wild-type

cells (GFP negative) and *Minute* cells (GFP positive)(magenta; A"). (B) Wing imaginal disc containing *Da*-overexpressing clones (*ActGal4>Da*, RFP positive, red). Note *ban-GFP* sensor is elevated in *Da*-overexpressing clones (green, B"). (C) Wing imaginal disc containing *Da*-overexpressing clones (*ActGal4>Da*, GFP positive, green). Note the decrease levels of *fj-lacZ* in *Da*-overexpressing clones (red, C"). (D) Wing imaginal disc containing *Yki*<sup>S168A</sup>-overexpressing clones (*ActGal4>Yki*<sup>S168A</sup>, GFP positive, green). Note that *fj-lacZ* is elevated by active *Yki* (red, D"). (E) Wing imaginal disc containing clones coexpressing *Da* and *Yki*<sup>S168A</sup> (*ActGal4>Da+Yki*<sup>S168A</sup>, GFP positive, green). Note *fj-lacZ* (red, E") and large clones. All crosses in B-E maintained at 18. (F) Wing imaginal disc containing *emc* mutant cells (GFP negative, F'). *diap1-lacZ* reporter expression (F", magenta) reduction in *emc* mutant clones. (G) Third instar wing disc containing wild-type control clones (GFP negative). Note that there is no difference of *diap1-lacZ* expression (magenta, G').

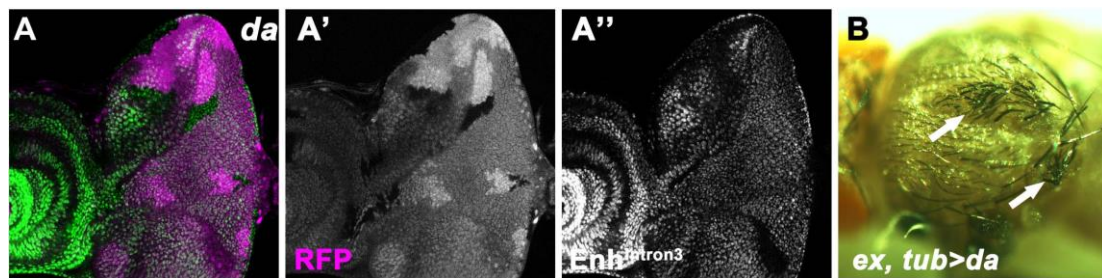

**Figure S6. Related to Figure 6**

(A) Third instar eye imaginal discs containing *da*<sup>3</sup> mutant cells (RFP negative) visualized for *Enh*<sup>intron3</sup>-GFP reporter expression (green). (B) Ectopic bristles (white arrows) in adult thorax containing *ex*<sup>e1</sup>, *tub>Da* clones.

| cytology   | Deficiency                                                              | Effect on eyg>da                                                           |
|------------|-------------------------------------------------------------------------|----------------------------------------------------------------------------|
| 1B5-1B8    | Df(1)Exel6221<br>Df(1)ED6396                                            | Mild suppression<br>suppression                                            |
| 2C7-2F5    | Df(1)ED6565<br>Df(1)ED409                                               | Moderate suppression<br>suppression                                        |
| 5C7-5E4    | Df(1)ED6802<br>Df(1)ED418<br>Df(1)ED6829                                | Mild suppression<br>Suppression<br>Mild suppression                        |
| 8F9-9B1    | Df(1)ED6991<br>Df(1)ED6989                                              | Suppression<br>Mild suppression                                            |
| 12E5-12E8  | Df(1)ED7225<br>Df(1)ED7229                                              | Suppression<br>Suppression                                                 |
| 21B3-21B7  | Df(2L)ED19<br>Df(2L)ED21                                                | Suppression<br>Mild suppression                                            |
| 21E2       | Df(2L)ED87<br>Df(2L)ED105<br>Df(2L)ED94                                 | Suppression<br>No effect<br>Suppression                                    |
| 23B8-23C5  | Df(2L)ED206<br>Df(2L)ED4651                                             | Suppression<br>Mild suppression                                            |
| 25F2-26B2  | Df(2L)ED334<br>Df(2L)ED320<br>Df(2L)ED334                               | Mild suppression<br>Suppression<br>Suppression                             |
| 26B2-26B5  | Df(2L)ED299<br>Df(2L)ED354<br>Df(2L)ED385<br>Df(2L)ED343<br>Df(2L)ED353 | No effect<br>Suppression<br>Suppression<br>No effect<br>Suppression        |
| 27A1-27C4  | Df(2L)ED441<br>Df(2L)ED6569<br>Df(2L)ED7007                             | Suppression<br>Suppression<br>Mild suppression                             |
| 27F7-28B1  | Df(2L)ED479<br>Df(2L)ED475<br>Df(2L)ED499<br>Df(2L)ED501<br>Df(2L)ED508 | Suppression<br>Suppression<br>Suppression<br>Mild suppression<br>No effect |
| 35B10-35D4 | Df(2L)ED1050<br>Df(2L)ED1054                                            | Enhancement<br>Enhancement                                                 |
| 36A10-36C7 | Df(2L)ED1109<br>Df(2L)ED1161<br>Df(2L)Exel7068                          | Mild suppression<br>Suppression<br>No effect                               |
| 36F7-37B1  | Df(2L)ED1196<br>Df(2L)ED1203                                            | Enhancement<br>Enhancement                                                 |
| 37B1-37B5  | Df(2L)ED1203<br>Df(2L)ED1202                                            | Enhancement<br>Enhancement                                                 |
| 39B4-39D2  | Df(2L)ED1378<br>Df(2L)ED1473                                            | Suppression<br>Suppression                                                 |
| 43A4-43D3  | Df(2L)ED1673<br>Df(2L)ED1715                                            | Suppression<br>Suppression                                                 |
| 44D4-44E3  | Df(2R)ED1735<br>Df(2R)ED1742                                            | No effect<br>Suppression                                                   |



| cytology   | Deficiency                                                   | Effect on eyg>da                                         |
|------------|--------------------------------------------------------------|----------------------------------------------------------|
| 53E4-53F8  | Df(2R)ED2747<br>Df(2R)ED2751<br>Df(2R)ED1<br>Df(2R)Exel6066  | Suppression<br>Suppression<br>Suppression<br>No effect   |
| 56D10-56E2 | Df(2R)ED3728                                                 | Suppression                                              |
| 61C7-61E2  | Df(3L)ED4177<br>Df(3L)ED4191<br>Df(3L)ED4196                 | Enhancement<br>Enhancement<br>Mild enhancement           |
| 61C9-61F7  | Df(3L)ED202<br>Df(3L)ED4238<br>Df(3L)ED207                   | Enhancement<br>Enhancement<br>Enhancement                |
| 68C13-69B4 | Df(3L)ED4475                                                 | Enhancement                                              |
| 69C4-69F6  | Df(3L)ED4486                                                 | Suppression                                              |
| 73D5-73E5  | Df(3L)ED4674<br>Df(3L)ED4685                                 | Suppression<br>Suppression                               |
| 75B1-75B11 | Df(3L)ED4710<br>Df(3L)ED224                                  | Suppression<br>Suppression                               |
| 75C6-75D4  | Df(3L)ED224<br>Df(3L)ED225                                   | Suppression<br>Suppression                               |
| 82A1-82D2  | Df(3R)ED5046<br>Df(3R)ED5071<br>Df(3R)ED5100<br>Df(3R)ED5092 | Suppression<br>Suppression<br>Suppression<br>Suppression |
| 82D5-82E4  | Df(3R)ED5142<br>Df(3R)ED5066<br>Df(3R)ED5095<br>Df(3R)ED5138 | Suppression<br>Suppression<br>Suppression<br>Suppression |
| 83B4-83B6  | Df(3R)Exel6144<br>Df(3R)ED5177                               | Suppression<br>Suppression                               |
| 85C3       | Df(3R)ED5301<br>Df(3R)ED5331                                 | Suppression<br>Suppression                               |
| 85E5-85F8  | Df(3R)ED5428<br>Df(3R)ED5438<br>Df(3R)ED5454                 | Suppression<br>No effect<br>Suppression                  |
| 95A4       | Df(3R)Exel6194<br>Df(3R)Exel6195                             | Moderate suppression<br>Suppression                      |
| 95B1-95B5  | Df(3R)Exel9013<br>Df(3R)Exel9014                             | Moderate suppression<br>Suppression                      |
| 99B2-99C1  | Df(3R)ED6310<br>Df(3R)ED6316                                 | Enhancement<br>Mild enhancement                          |
| 99F8-100A5 | Df(3R)Exel6215<br>Df(3R)Exel7378<br>Df(3R)Exel6346           | No effect<br>Suppression<br>No effect                    |

**Table S1. Summary of deficiency screen for dominant modifiers.  
Related to Figure 1.**

414 deficiency stocks from the DrosDel and Exelixis collections were

screened to identify genomic regions that exhibited a modifying effect on *eyg>Da* phenotype. From this screen, a total of 38 genomic regions were identified based on their modifier capability. 30 genomic regions showed suppression and 8 genomic regions showed enhancement on *eyg>Da* phenotype.

| Effected genes | Alleles tested                                                         | Type of allele                     | <i>eyg&gt;Da</i> modification |
|----------------|------------------------------------------------------------------------|------------------------------------|-------------------------------|
| p35            | UAS-p35                                                                | Over-expression                    | ---                           |
| hid, grim, rpr | Df(3L)ED224/+<br>Df(3L)H99/+                                           | deficiency<br>deficiency           | ---<br>---                    |
| grim, rpr, skl | Df(3L)ED225/+                                                          | deficiency                         | ---                           |
| Diap1          | Diap1 <sup>4</sup> /+<br>UAS-Diap1,UAS-Diap1                           | amorph<br>Over-expression          | (+)<br>--                     |
| drice, stg     | Df(3R)ED6316/+                                                         | deficiency                         | +                             |
| dronc          | Df(3L)Exel9048/+<br>UAS-dronc <sup>DN</sup> /+                         | Deficiency<br>Dominant negative    | no effect<br>---              |
| dark           | dark <sup>CD8</sup> /+<br>dark <sup>K11502</sup> dark <sup>82</sup> /+ | hypomorph<br>Loss of function      | no effect<br>--               |
| CycE           | Df(2L)ED1050/+<br>Df(2L)ED1054/+<br>CycE <sup>AR95</sup> /+            | deficiency<br>deficiency<br>amorph | ++<br>++<br>+++               |
| E2f1           | E2f1 <sup>07172</sup> /+                                               | Loss of function                   | ++++                          |
| Rbf            | Rbf <sup>14</sup> /+                                                   | amorph                             | ---                           |
| CycB3          | Df(3R)ED6220/+<br>CycB3 <sup>2</sup> /+                                | deficiency<br>Loss of function     | no effect<br>+                |
| CycA           | Df(3L)ED4475/+<br>CycA <sup>C8LR1</sup> /+                             | deficiency<br>amorph               | +++<br>++                     |
| stg            | Df(3R)ED6310/+<br>Stg <sup>4</sup> /+                                  | deficiency<br>amorph               | +++<br>+++                    |
| wee1           | Df(2L)ED441/+<br>wee1 <sup>ES1</sup> /+                                | deficiency<br>amorph               | ---<br>---                    |
| CycB           | CycB <sup>2</sup> /+                                                   | Loss of function                   | +                             |
| cdc2c          | Cdc2c <sup>2</sup> /+                                                  |                                    | +                             |
| cdc2           | cdc2 <sup>E1-23</sup> /+                                               | amorph                             | +                             |
| dap            | Df(2R)Exel901/+<br>Dap <sup>4</sup> /+                                 | deficiency<br>amorph               | no effect<br>--               |

**Table S2. A subset of cell cycle/ cell death genes genetically interact with *eyg>da*. Related to Figure 1.**

Key: +++, strong enhancement; ++ moderate enhancement; + mild enhancement; --- strong suppression; -- moderate suppression; - mild

suppression.

## Supplemental Experimental Procedures

### Mutants and Transgenes

*ex<sup>e1</sup>* (Boedigheimer and Laughon, 1993); *emc<sup>AP6</sup>* (Ellis, 1994); *hpo<sup>MGH4</sup>* (Emoto et al., 2006); *ft<sup>NY1</sup>* (Tyler et al., 2007); *yki<sup>B5</sup>* (Huang et al., 2005); *wts<sup>MGH1</sup>*, *sav<sup>2</sup>* (Tapon et al., 2002); *wts<sup>X1</sup>* (Xu et al., 1995); *crb<sup>11A22</sup>* (Tepass et al., 1990); *crb<sup>82-04</sup>* (Ling et al., 2010); Pten<sup>MGH1</sup> (from I. Hariharan); *Diap1<sup>4</sup>* (Hay et al., 1995); *dark<sup>CD8</sup>* (Rodriguez et al., 1999); *dark<sup>K11502</sup>* (Zhou et al., 1999); *dark<sup>82</sup>* (Akdemir et al., 2006); *Df(3L)H99 FRT80B* (Cullen and McCall, 2004), *CycE<sup>AR95</sup>* (Knoblich et al., 1994); *E2f1<sup>07172</sup>* (Duronio et al., 1995); *Rbf<sup>14</sup>* (Du and Dyson, 1999); *stg<sup>4</sup>* (Edgar and O'Farrell, 1989); *CycA<sup>C8LR1</sup>* (Knoblich and Lehner, 1993); *CycB3<sup>2</sup>*; *CycB<sup>2</sup>* (Jacobs et al., 1998); *cdc2c<sup>2</sup>* (Lane et al., 2000), *cdc2<sup>E1-23</sup>* (Clegg et al., 1993); *wee1<sup>ES1</sup>* (Price et al., 2000); *dap<sup>4</sup>* (Lane et al., 1996) are strong or null alleles. *Act5C>CD2> GAL4 UAS-RFP*, and deficiency strains (Ryder et al., 2007) are described in Flybase (Marygold et al., 2013). Other transgenic lines used in this study included the *bantam* sensor (Brennecke et al., 2003), *ex-lacZ* (Blaumueller and Mlodzik, 2000), *fj-lacZ* (Villano and Katz, 1995), *Diap-lacZ* (Wu et al., 2008), *eyg<sup>CD</sup>-GAL4* (Wang et al., 2008), *UAS-DroncDN* (Meier et al., 2000).

To construct GFP reporter transgenes, genomic fragments covering the transcription start site (Proximal promoter region, 430000-432000 according to *R5.5* of *D. melanogaster* genome) or part of the third intron of *ex* (Enh<sup>Intron3</sup>, 441500-443000) were PCR amplified and cloned into the PH-Stinger vectors (Barolo et al., 2000). Subfragments derived from Enh<sup>Intron3</sup> were obtained by PCR amplification and cloned between BamHI and XhoI sites in the PH-Stinger vectors. Constructs carrying mutated E-box binding sites were

generated by PCR mutagenesis by the QuikChange Site-Directed Mutagenesis kit (Stratagene). The Da homodimer expression transgene was constructed to mimic a previously-reported construct (Castanon et al., 2001), which was in turn based on a tethered E47-MyoD protein shown to be insensitive to Id proteins (Neuhold and Wold, 1993). Two Da monomer open reading frames (710 aa and 709 aa) were joined in frame via a flexible Gly/Ser rich linker and cloned into the pUAST vector. To generate HA tagged Da transgene, Da cDNA was cloned into the pUAST vector by PCR amplification using primers with HA epitope YPYDVPDYA sequences.

### **Clonal Induction**

Flp-out expression clones were generated by crossing *UAS*-lines to *hs-FLP*<sup>122</sup>; *Act5C>CD2> GAL4 UAS-RFP*. Without co-expressing with *p35*, flies of Da flp-out clones were crossed and incubated at 18°C to preserve the survival of Da-overexpressing clones. Heat shocks were performed at 36-48 hr AEL and animals were dissected at late third instar.

### **Immunohistochemistry and Scanning Electron Microscopy**

Immunostaining and confocal image acquisition were performed as described previously (Firth et al., 2006). Antibodies recognizing the following epitopes were used: Expanded (guinea pig, provided by R. Fehon); Dcp-1 (rabbit, Cell Signaling #9578); beta-galactosidase (mouse, DSHB #40-1a); GFP (rat, NACALAI TESQUE# GF090R). Scanning electron microscopy (SEM) and photograph of adult flies were carried out using Zeiss Supra 40 microscope and Leica MZFLIII microscope (Baker et al., 2014).

## References

Akdemir,F., Farkas,R., Chen,P., Juhasz,G., Medved'ova,L., Sass,M., Wang,L., Wang,X., Chittaranjan,S., Gorski,S.M., Rodriguez,A., and Abrams,J.M. (2006). Autophagy occurs upstream or parallel to the apoptosome during histolytic cell death. *Development* 133, 1457-1465.

Baker,N.E., Li,K., Quiquand,M., Ruggiero,R., and Wang,L.H. (2014). Eye development. *Methods* 68, 252-259.

Barolo,S., Carver,L.A., and Posakony,J.W. (2000). GFP and beta-galactosidase transformation vectors for promoter/enhancer analysis in *Drosophila*. *Biotechniques* 29, 726, 728, 730, 732.

Blaumueller,C.M. and Mlodzik,M. (2000). The *Drosophila* tumor suppressor expanded regulates growth, apoptosis, and patterning during development. *Mech. Dev.* 92, 251-262.

Boedigheimer,M. and Laughon,A. (1993). Expanded: a gene involved in the control of cell proliferation in imaginal discs. *Development* 118, 1291-1301.

Brennecke,J., Hipfner,D.R., Stark,A., Russell,R.B., and Cohen,S.M. (2003). bantam encodes a developmentally regulated microRNA that controls cell proliferation and regulates the proapoptotic gene hid in *Drosophila*. *Cell* 113, 25-36.

Castanon,I., Von,S.S., Kass,J., and Baylies,M.K. (2001). Dimerization partners determine the activity of the Twist bHLH protein during *Drosophila*

mesoderm development. *Development* 128, 3145-3159.

Clegg,N.J., Whitehead,I.P., Williams,J.A., Spiegelman,G.B., and Grigliatti,T.A. (1993). A developmental and molecular analysis of Cdc2 mutations in *Drosophila melanogaster*. *Genome* 36, 676-685.

Cullen,K. and McCall,K. (2004). Role of programmed cell death in patterning the *Drosophila* antennal arista. *Dev. Biol.* 275, 82-92.

Du,W. and Dyson,N. (1999). The role of RBF in the introduction of G1 regulation during *Drosophila* embryogenesis. *EMBO J.* 18, 916-925.

Duronio,R.J., O'Farrell,P.H., Xie,J.E., Brook,A., and Dyson,N. (1995). The transcription factor E2F is required for S phase during *Drosophila* embryogenesis. *Genes Dev.* 9, 1445-1455.

Edgar,B.A. and O'Farrell,P.H. (1989). Genetic control of cell division patterns in the *Drosophila* embryo. *Cell* 57, 177-187.

Ellis,H.M. (1994). Embryonic expression and function of the *Drosophila* helix-loop-helix gene, *extramacrochaetae*. *Mech. Dev.* 47, 65-72.

Emoto,K., Parrish,J.Z., Jan,L.Y., and Jan,Y.N. (2006). The tumour suppressor Hippo acts with the NDR kinases in dendritic tiling and maintenance. *Nature* 443, 210-213.

Firth,L.C., Li,W., Zhang,H., and Baker,N.E. (2006). Analyses of RAS regulation of eye development in *Drosophila melanogaster*. *Methods Enzymol.* 407, 711-721.

Hay,B.A., Wassarman,D.A., and Rubin,G.M. (1995). *Drosophila* homologs of

baculovirus inhibitor of apoptosis proteins function to block cell death. *Cell* 83, 1253-1262.

Huang,J., Wu,S., Barrera,J., Matthews,K., and Pan,D. (2005). The Hippo signaling pathway coordinately regulates cell proliferation and apoptosis by inactivating Yorkie, the *Drosophila* Homolog of YAP. *Cell* 122, 421-434.

Jacobs,H.W., Knoblich,J.A., and Lehner,C.F. (1998). *Drosophila* Cyclin B3 is required for female fertility and is dispensable for mitosis like Cyclin B. *Genes Dev.* 12, 3741-3751.

Knoblich,J.A. and Lehner,C.F. (1993). Synergistic action of *Drosophila* cyclins A and B during the G2-M transition. *EMBO J.* 12, 65-74.

Knoblich,J.A., Sauer,K., Jones,L., Richardson,H., Saint,R., and Lehner,C.F. (1994). Cyclin E controls S phase progression and its down-regulation during *Drosophila* embryogenesis is required for the arrest of cell proliferation. *Cell* 77, 107-120.

Lane,M.E., Elend,M., Heidmann,D., Herr,A., Marzodko,S., Herzig,A., and Lehner,C.F. (2000). A screen for modifiers of cyclin E function in *Drosophila melanogaster* identifies Cdk2 mutations, revealing the insignificance of putative phosphorylation sites in Cdk2. *Genetics* 155, 233-244.

Lane,M.E., Sauer,K., Wallace,K., Jan,Y.N., Lehner,C.F., and Vaessin,H. (1996). Dacapo, a cyclin-dependent kinase inhibitor, stops cell proliferation during *Drosophila* development. *Cell* 87, 1225-1235.

Ling,C., Zheng,Y., Yin,F., Yu,J., Huang,J., Hong,Y., Wu,S., and Pan,D. (2010).

The apical transmembrane protein Crumbs functions as a tumor suppressor that regulates Hippo signaling by binding to Expanded. *Proc. Natl. Acad. Sci. U. S. A* *107*, 10532-10537.

Marygold,S.J., Leyland,P.C., Seal,R.L., Goodman,J.L., Thurmond,J., Strelets,V.B., and Wilson,R.J. (2013). FlyBase: improvements to the bibliography. *Nucleic Acids Res.* *41*, D751-D757.

Meier,P., Silke,J., Leever,S.J., and Evan,G.I. (2000). The *Drosophila* caspase DRONC is regulated by DIAP1. *EMBO J.* *19*, 598-611.

Neuhold,L.A. and Wold,B. (1993). HLH forced dimers: tethering MyoD to E47 generates a dominant positive myogenic factor insulated from negative regulation by Id. *Cell* *74*, 1033-1042.

Price,D., Rabinovitch,S., O'Farrell,P.H., and Campbell,S.D. (2000). *Drosophila wee1* has an essential role in the nuclear divisions of early embryogenesis. *Genetics* *155*, 159-166.

Rodriguez,A., Oliver,H., Zou,H., Chen,P., Wang,X., and Abrams,J.M. (1999). Dark is a *Drosophila* homologue of Apaf-1/CED-4 and functions in an evolutionarily conserved death pathway. *Nat. Cell Biol.* *1*, 272-279.

Ryder,E., Ashburner,M., Bautista-Llacer,R., Drummond,J., Webster,J., Johnson,G., Morley,T., Chan,Y.S., Blows,F., Coulson,D., Reuter,G., Baisch,H., Apelt,C., Kauk,A., Rudolph,T., Kube,M., Klimm,M., Nickel,C., Szidonya,J., Maroy,P., Pal,M., Rasmuson-Lestander,A., Ekstrom,K., Stocker,H., Hugentobler,C., Hafen,E., Gubb,D., Pflugfelder,G., Dorner,C., Mechler,B., Schenkel,H., Marhold,J., Serras,F., Corominas,M., Punset,A., Roote,J., and



Russell,S. (2007). The DrosDel deletion collection: a Drosophila genomewide chromosomal deficiency resource. *Genetics* 177, 615-629.

Tapon,N., Harvey,K.F., Bell,D.W., Wahrer,D.C., Schiripo,T.A., Haber,D., and Hariharan,I.K. (2002). salvador Promotes both cell cycle exit and apoptosis in Drosophila and is mutated in human cancer cell lines. *Cell* 110, 467-478.

Tepass,U., Theres,C., and Knust,E. (1990). crumbs encodes an EGF-like protein expressed on apical membranes of Drosophila epithelial cells and required for organization of epithelia. *Cell* 61, 787-799.

Tyler,D.M. and Baker,N.E. (2007). Expanded and fat regulate growth and differentiation in the Drosophila eye through multiple signaling pathways. *Dev. Biol.* 305, 187-201.

Villano,J.L. and Katz,F.N. (1995). four-jointed is required for intermediate growth in the proximal-distal axis in Drosophila. *Development* 121, 2767-2777.

Wang,L.H., Chiu,S.J., and Sun,Y.H. (2008). Temporal switching of regulation and function of eye gone (eyg) in Drosophila eye development. *Dev. Biol.* 321, 515-527.

Wu,S., Liu,Y., Zheng,Y., Dong,J., and Pan,D. (2008). The TEAD/TEF family protein Scalloped mediates transcriptional output of the Hippo growth-regulatory pathway. *Dev. Cell* 14, 388-398.

Xu,T., Wang,W., Zhang,S., Stewart,R.A., and Yu,W. (1995). Identifying tumor suppressors in genetic mosaics: the Drosophila lats gene encodes a putative protein kinase. *Development* 121, 1053-1063.

Zhou,L., Song,Z., Tittel,J., and Steller,H. (1999). HAC-1, a Drosophila homolog of APAF-1 and CED-4 functions in developmental and radiation-induced apoptosis. *Mol. Cell* 4, 745-755.
